# Supplementary material
Source: PubMed Central journal article supplement (PMC3571714)
Supplement: NIHMS438177-supplement-1_si_001.pdf [file NIHMS438177-supplement-1_si_001.pdf]

# Supplemental Information

**Title: Nonribosomal Propeptide Precursor in Nocardicin A Biosynthesis Predicted from Adenylation Domain Specificity Dependent on the Mbth Family Protein Nocl**

Jeanne M. Davidsen, David M. Bartley<sup>1</sup> and Craig A. Townsend\*

*Department of Chemistry, Johns Hopkins University, Baltimore, Maryland 21218*

<sup>1</sup>Current address: Department of Chemistry, Adrian College, Adrian, MI 49221

\* Corresponding author. Mailing address: Department of Chemistry, Johns Hopkins University, Baltimore, MD 21218. Phone: (410) 516-7444. Fax: (410) 261-1233. E-mail: ctownsend@jhu.edu.

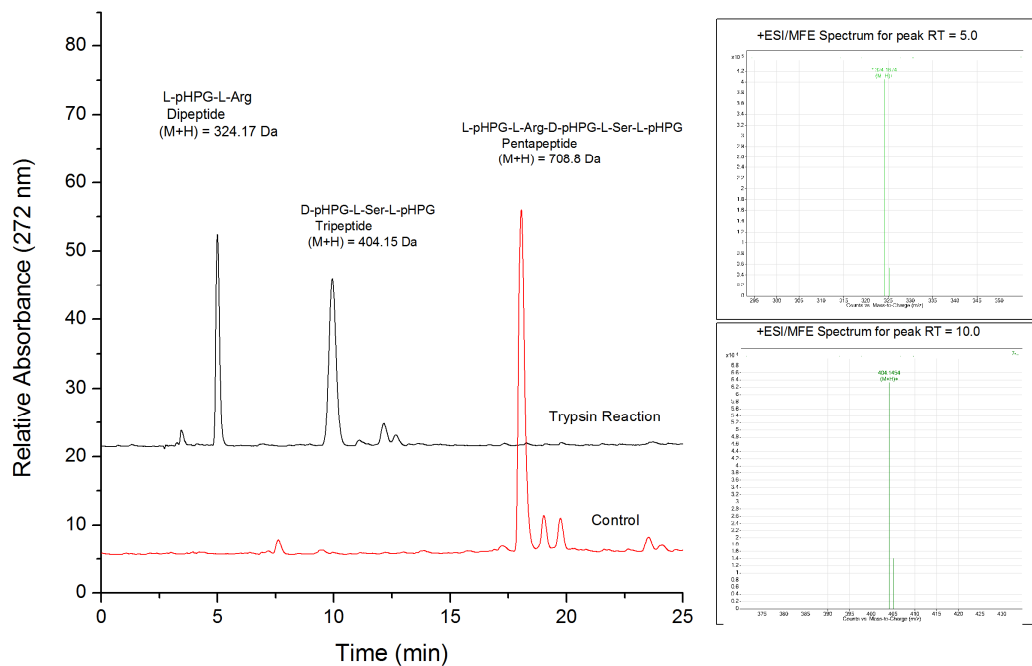

Figure S1. HPLC analysis of the reaction of pentapeptide L-pHPG-L-Arg-D-pHPG-L-Ser-L-pHPG with trypsin (black) versus a control (red). Mass determination by LC/MS TOF for the two major peaks of the trypsin reaction are shown on the right.

```

NocA A2 (1) -----GRTRLTGAPVEPVLGAPVAPPAPPVLRRLVRDAAARRPDAPAVVDGGEVVTGYAELVRRAD
NocB A4 (1) VTFRVRDLFADDAGEATAQLAAWNTARDPTEVGVHELVRQAAEHGARGAVTFEGATTYYAELDAAAA
NocA A1 (1) -----MRDSEEWERGARVDHGGPGLWRSIAAVLAGGGARAAVVRGARSLFAELDARTS
NocA A3 (1) -----GDDERRRLVGLNARHRPERPEGLVALVADWVARTPDATAVTAPTGRLLTYRELDALSD
NocB A5 (1) --LSELELLPAADRELLGSWNGATRGTGDCQEPSLLDLFLRHRRAATPDAPAVVENGVVLDYAGLDERAI

NocA A2 (60) AVAARIRAAGGGPGDVVGVCLPRSTDLVAALLGVLAAGRAFLPLSPEDPDRITRQLDLGGARLVIAADA
NocB A4 (71) GLARRLAGAVRPGDVVAIALPPSEERRIAAVLGALRAGAAYLPDPELPAERLEFLADAGAAVLTDTA
NocA A1 (55) ALAGRLRAAGVGAERPVAVLAEDGVQVVAQLAVFRAGGVYLPVDPAPWAGRRAAVLADAGFAAVVGGGA
NocA A3 (59) GVAGWLRDRGLPAEGLVATRLGRCLLPAVVLGIWKAGGAYVPLDPAQPAERHRRILADCRPRAVVADRD
NocB A5 (69) ALADRLAEAGVRAGHLVGVCLRRSAAHPIALAVHRS GAVPVLLDPEHPVARLREAAADAGVAAVVTTAD

NocA A2 (130) D-----RFAADRFAVGTAVSPLVPAEGAGEAPLA--PLPEPLPGDAAYVIFTSGSTGEPKG
NocB A4 (141) T-----REGPVAAHGDPTVLCDRSPDGAPTAETAEPAEFPGSALAAVVIYTSGSTGRPKG
NocA A1 (125) LDGGVAGAGALHAGAPGAGSTDAVLAEEAPVLPVHVGDDEGAEGVWPPEPERDQAAVLYVYTSGSTGRPKG
NocA A3 (129) D-----P-----VFGDTPLLTVADLRPGAPAPVRRPPEPDRLAYVAYTSGSTGEPKG
NocB A5 (139) Q-----AGFEAWPVVHPDGGIVAPTEPAACRPG-----SADPARDA CVVYTSGSTGEPKG

NocA A2 (184) VVVEHRALADHVRWAVGEYGLTAGDRALQFCAVAFDVLVEEVLPTLASGAAVLRDEESATSAQALVELC
NocB A4 (198) VAVDHRSLVNRLLMRERYGVGGQDVVLHKTSFGFDVSVWQQLPLISGARLVIAPIQETRRDATALVRLV
NocA A1 (195) VLVTHGALANRMLWVQGEHPLGPDVLMATASPAFDIAVWELLAAVFGGARLVIAEHRLRGVVPHLPELM
NocA A3 (175) VQCAHHLANQLMWSRRAYPLNPGEAALQVAAVGFDISLWELLHPLTSGGRLVVLQQRHGDVVAIAELV
NocB A5 (189) V LAPQAGLVNRLVWSGRAFFTPEPPRVLATAGTAFDIALWFTFFPLAHGGAVVTA PQDAVLDPDALAEI

NocA A2 (254) AARGVTVANLPTGYWERLVAAFDDEDGTALPPSVRLVVTGGQQVDRSAVERWHRLPNPVLVNVAYGPTTEMT
NocB A4 (268) RAESVTVLHFVPSLLPAFLDVAEVEQ---ARALRVATISSGEALPKPVAVDFAARRLPHCALHNLYGPTTEAT
NocA A1 (265) TDHRVTVAHFVPSVLEELLGWMADGG---RVGLRLVWVCGEAVPPSQDRLLALSG-ARMVHAYGPTTETT
NocA A3 (245) AAERVVVLHLVPTLLEHYLDEGPADS-----LRHVWVCGBERLSPGLPARFAARTP-AALNHTYGPTEAS
NocB A5 (259) VAERVTVAHFLPSLLAAFLDSFKAAG---CTGLAHVLSGGEAVTPAIVRAFTGSGLPARLHQAYGPAEAS

NocA A2 (324) TGATAADLV--PG--GGVPIGGPTENTRAYLLDRYLAPVDPGVVAELYLASGLARGYSRREGLTGERFL
NocB A4 (335) IDVTHWPVDG--DDERPFVPICTPIDNTSVYVLDHLEPLVGAEGELCIGGQVAVALGYLGRFALTAEKFA
NocA A1 (331) ITVVHDECRA--DDPAPGLPLGRPMHNAAVVVDADGRRAPVGVAGELVVGVPPLARGYLGRFETAARFV
NocA A3 (308) ITVTHWRSP--DPAPDAVSLGAPLPGARVYLLDPHGQPVVGVVVGELVVGGEVLARGYLGRFGATAERFL
NocB A5 (326) ISVTHHTCAPEDGLRERVPIGRPIDGAGAHVVDEHLRELVPVCGVELAVTVAVGAGYPNDELTARRFP
*

NocA A2 (390) PDPFAG--GGQRMVRTGDLAVRR--DGALHFI GRVDRQVKVRGHRIELDEVESALTAAPGVAAEAVLLRGG
NocB A4 (404) PDPFGA--PGARMYRTGDRARFGPDGAIEYLGRRDQVKLRGYRVELGETEAALLESDLVRQAAVVVRGE
NocA A1 (400) PDWLGLGPAGGRVYRTGDRARRLPDGRIEFLGRVDEDFKVRGHRVDPAEIESLLHQHPLVGRAAVRLADG
NocA A3 (376) PDPFSD--VPGARAYRTGDLARHPDGGLEFVGRADRQVKIILGVRVPEPHEVETALVANPAVAACAVLPRED
NocB A5 (396) ANPFGA---QFLYLTGDLARWGADGELEFLGRRDRQVKVRGHRVEFAEVDRTAELHPGVQAVTVFRDG

NocA A2 (457) RL-----V-AHVAAPPEVDGAGLRAHLAAGRLPAFMVPSVVVVSRALEPTSTGKVDNRNALTAEPEDEP
NocB A4 (472) GGAKRLVGFVSGRPDAAGGAEGAEAHVLRARLSATLPAYQVPSQLVWLDALPLTPSGKVDRALPETAAAH
NocA A1 (470) AH-----VVAYLQGSADPAELRAHLADRLPLAVIPTRWVRLDRFELTPNGKVDYAAALPAAPARA
NocA A3 (445) ARGAVLVGYLVPADRDADPQLRAEVEGRLRERLRPRAMVPSRLVLEALFVPGTKGLDVGALPEPDEAP
NocB A5 (462) AL-----TTFAPRAGALLDVA DLRRLLRERLEPDMV--GELVVLDALEVTGNGKVDQRALLDLAGAG

```

Figure S2. Alignment of the amino acid sequences of the A-domains of NocA and NocB. Identical residues are indicated by a gray shadow. Amino acid substrate binding site residues

predicted by PheA crystal structure are boxed. The amino acid site corresponding to CloH L383 is marked by an asterisk.

|         |       |                                                                        |
|---------|-------|------------------------------------------------------------------------|
| NocA A1 | (369) | PVGVAGELVVGGLVPLARGYLGRPGETAARFVDPDWLGLGPAGGRVYRTGDRARRLPDGRIEFLGRVDE  |
| NocA A2 | (359) | PDGVVAELYLAGSGLARGYSRRPGLTGERFLPDPFAG--GGQRMRYRTGDLA-VRRDGALHFIGRVDRQ  |
| NocB A4 | (373) | PVGAEGELCIGGQAVALGYLGRPALTAEKFAFPDPFGA--PGARMYRTGDRARFGPDGAI EYLGRRDQ  |
| CmnA A2 | (356) | PPGSTGELCVGGLPVARGYLGRPALTAEKFAFPDPFGA--AGARLYRTGDLARLLPDGQLDFLGRNDFQ  |
| CmnA A1 | (356) | PAGVVGEVFLGGASVTRGYHARPALTAERFVDPDFGP--PGSRLYRTGDLGRVTPDGELEFLGRRDHQ   |
| CmnO    | (348) | --DGLFELHVGGPPTLAWGYRDRPAATAERFPPDERGR-----RFRTGDLVVRVADDGALVFVGRADRQ  |
| VioA A1 | (372) | APNEVGEVYLGASVTRGYHGRAALTAQRFVDPDPYGP--PGSRLYRTGDLGRVEDNGELRLLGRIDHQ   |
| VioA A2 | (357) | PRGTVGELYVSGAPVARGYLGRPALTADRFVDPDPYGP--PGSRMYRTGDLGRFTGEGLLDFQGRGDFQ  |
| VbsS    | (359) | PIGVTGELYIGGEGIARGYLKPDTTADRFVDPDPFFG--EGGRLYRSGDLTRWRDDGTVEFVGRVDHQ   |
| PacL    | (354) | PPGTVGELYLGAGLARCYFGNPALTAERFVDPDPFHG--VGTRMYRSGDLGRWTRDGLLMFVGRTDDQ   |
| GlbF    | (365) | PVGATGELYVAGAGLARGYLGRPALTAEKFAFPDPFGA--SGSRMYRTGDLARWRADGGLDFLGRADEQ  |
| NovH    | (355) | APGEIGELYLSGAGLAQGYLNSPDLTAQMFVNPFFAA--DGERMYRTGDLASRRADGDILFHGRIDDQ   |
| CloH    | (355) | AVGEIGELYISGAGLARGYLNRPDLTAEKFAFPDPFFAA--DGERMYRTGDLASMRADGDILFHGRIDDQ |
|         |       | *                                                                      |

Figure S3. Alignment of the amino acid sequences of MbtH protein dependent A-domains. The amino acid site corresponding to CloH L383 is marked by an asterisk and identical residues are indicated by a gray shadow.

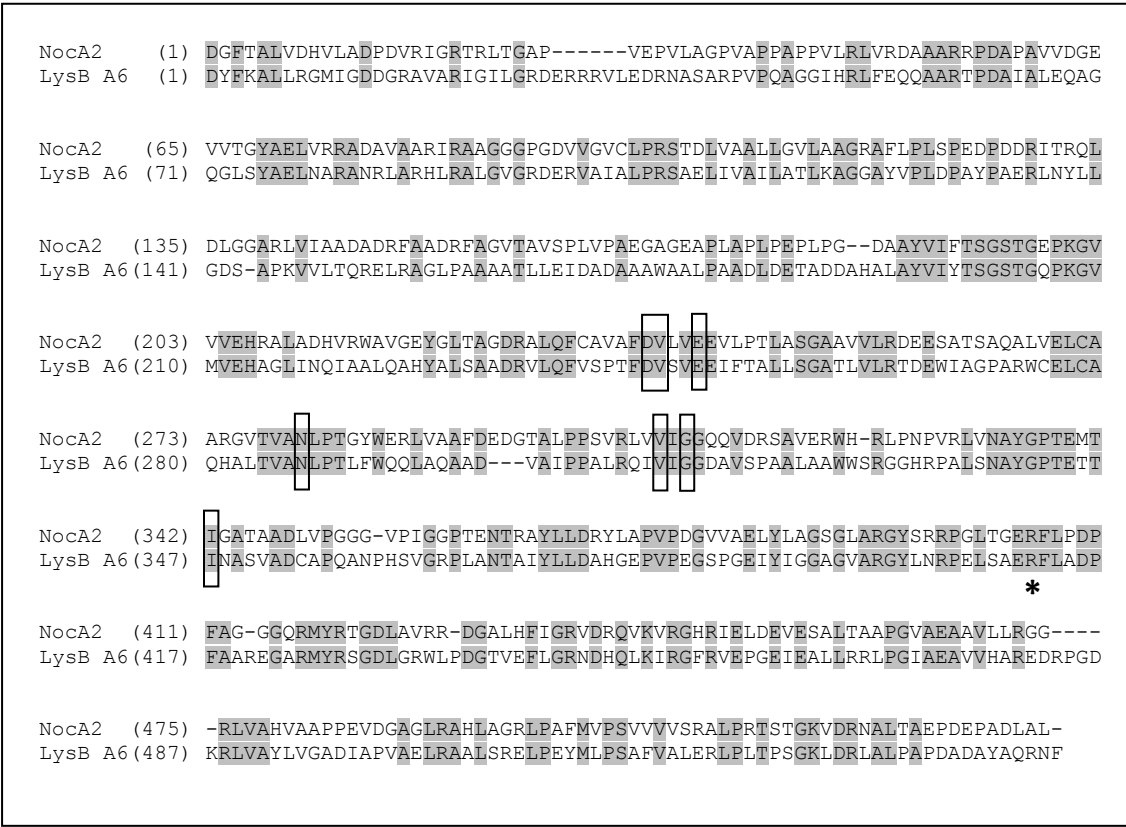

Figure S4. Alignment of the amino acid sequences of L-Arg activating A-domains; MbH protein dependent NocA2 versus MbH independent LysB A6. Amino acid substrate binding site residues predicted by PheA crystal structure are boxed and identical residues are indicated by gray shadowing. The amino acid site corresponding to CloH L383 is marked by an asterisk.

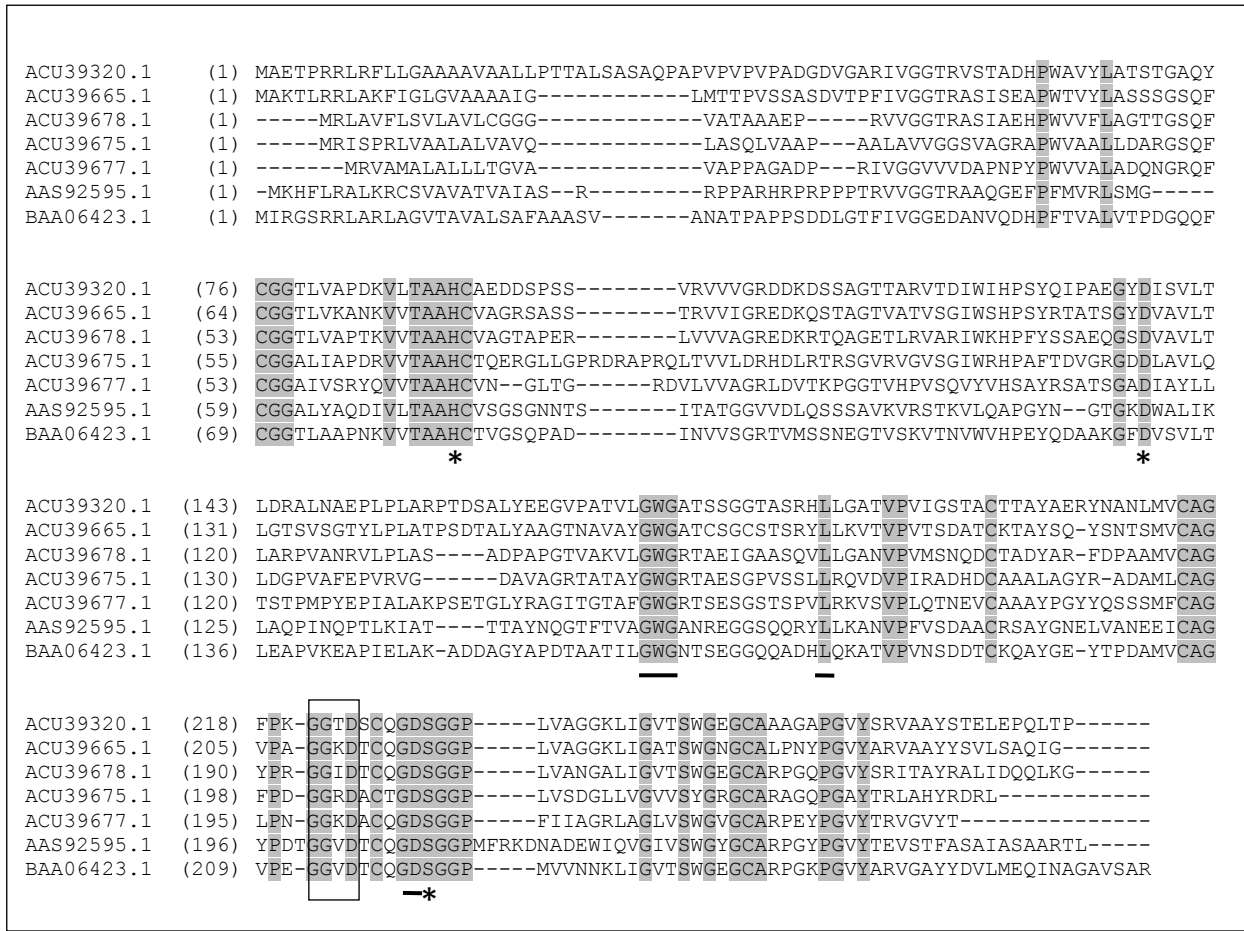

Figure S5. Alignment of five trypsin proteins (ACU prefix) encoded in the *Actinosynnema mirum* DSM 43827 genome (GenBank NC\_013093.1) aligned to the characterized trypsins from *Streptomyces griseus* (AAS92595.1) and *Saccharopolyspora erythraeus* (BAA06423.1). Identical residues are indicated by a gray shadow. Conserved motif in specificity pocket (GGxD) is boxed. Residues of the catalytic triad are marked with an asterisk. Conserved residues associated with zymogen activation are underlined.
